# Supplementary material for: Monitoring Dropping Densities with Unmanned Aerial Vehicles (UAV): An Effective Tool to Assess Distribution Patterns in Field Utilization by Foraging Geese
Source: MDPI journal article supplement (doi:10.3390/sym14102175), 2022-10-17
Supplement: s1 [file s1]

Archive with 1 entries (1 files):
- symmetry-1836190-supplementary.pdf
